# Supplementary material for: Using beryllium bonds to change halogen bonds from traditional to chlorine-shared to ion-pair bonds
Source: Royal Society of Chemistry journal article supplement (doi:10.1039/c4cp04574b), 2014-11-28
Supplement: c4cp04574b1.pdf [file c4cp04574b1.pdf]

Supporting Information

Using Beryllium Bonds to Change Halogen Bonds  
from Traditional to Chlorine-shared to Ion-Pair

Ibon Alkorta,\* José Elguero\*

*Instituto de Química Medica (IQM-CSIC), Juan de la Cierva 3  
28006-Madrid, Spain*

Otilia Mó,\* Manuel Yáñez\*

*Departamento de Química, Módulo 13, Universidad Autónoma de Madrid, Campus de Excelencia UAM-  
CSIC, Cantoblanco, 28049 Madrid, Spain*

Janet E. Del Bene\*

*Department of Chemistry, Youngstown State University, Youngstown,  
Ohio 44555, USA*

|             |                                                                                                                                                               |
|-------------|---------------------------------------------------------------------------------------------------------------------------------------------------------------|
| Page S2     | Table S1. MEP minima ( $V_{S,Min}$ ) and maxima ( $V_{S,Max}$ ) on the 0.001 au electron density isosurfaces of isolated monomers                             |
| Pg. S3-S8   | Table S2. MP2/aug'-cc-pVTZ total energies, geometries, and molecular graphs of binary complexes XYBe:FCl and FCl:N-base and ternary complexes XYBe:FCl:N-base |
| Pg. S9-S10  | Table S3. Electron density properties of FCl and binary and ternary complexes at bond critical points                                                         |
| Pg. S11     | Table S4. NBO bond orders for FCl, binary complexes XYBe:FCl and FCl:N-base, and ternary complexes XYBe:FCl:N-base                                            |
| Pg. S12-S13 | Table S5. Many-body interaction energies (MBIE, $\text{kJ}\cdot\text{mol}^{-1}$ ) in binary and ternary complexes                                             |
| Pg. S14-S16 | Table S6. Coupling constants (J) and their components (Hz) across Be $\cdots$ F, F-Cl, and Cl $\cdots$ N bonds                                                |

Table S1. MEP minima ( $V_{S,Min}$ ) and maxima ( $V_{S,Max}$ ) on the 0.001 au electron density isosurfaces of isolated monomers

|                   | $V_{S,Min}$ (au)       | $V_{S,Max}$ (au) |
|-------------------|------------------------|------------------|
| BeH <sub>2</sub>  | -0.020                 | 0.061            |
| BeHF              | -0.038 (F), -0.012 (H) | 0.071            |
| BeF <sub>2</sub>  | -0.034                 | 0.103            |
| BeCl <sub>2</sub> | -0.008                 | 0.061            |
|                   |                        |                  |
| FCl               | -0.012                 | 0.065            |

Nitrogen bases  $V_{S,Min}$  (au)

|                    |        |
|--------------------|--------|
| NH <sub>3</sub>    | -0.060 |
| CH <sub>2</sub> NH | -0.059 |
| NCH                | -0.066 |

Table S2. MP2/aug'-cc-pVTZ total energies, geometries, and molecular graphs of binary complexes XYBe:FCl and FCl:N-base and ternary complexes XYBe:FCl:N-base

|                                                                                     |                                                                                                                                                                                                                                                                                                    |
|-------------------------------------------------------------------------------------|----------------------------------------------------------------------------------------------------------------------------------------------------------------------------------------------------------------------------------------------------------------------------------------------------|
| 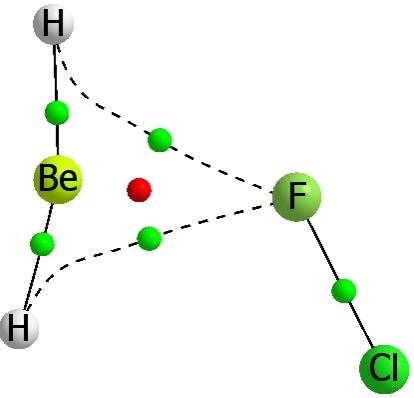   | <p>beh2_fcl_augp MP2= -575.19788431 NIMAG= 0<br/>           Be,-3.2772199668,0.765823141,0.<br/>           H,-2.539097152,1.8812736632,0.<br/>           H,-4.2989938339,-0.0956730956,0.<br/>           F,-1.7988585899,-0.670897137,0.<br/>           Cl,-0.19701864,-0.2516192531,0.</p>        |
|    | <p>behf_fcl_E MP2= -674.45590581 NIMAG= 0<br/>           Be,-3.3462239451,0.8342679489,0.<br/>           H,-2.5613247719,1.9078083697,0.<br/>           F,-4.3803141623,-0.0885470989,0.<br/>           F,-1.7004109947,-0.7522541148,0.<br/>           Cl,-0.1229143085,-0.2723677864,0.</p>      |
|   | <p>behf_fcl_Z MP2= -674.45639874 NIMAG= 0<br/>           Be,-3.2965234122,0.7495937856,0.<br/>           F,-2.5271975588,1.9106550705,0.<br/>           H,-4.3305806783,-0.0894021576,0.<br/>           F,-1.7758256736,-0.6933837213,0.<br/>           Cl,-0.1810608598,-0.2485556587,0.</p>      |
|  | <p>bef2_fcl_augp MP2= -773.70622453 NIMAG= 0<br/>           Be,-3.2297578973,0.7191127181,0.<br/>           F,-2.4926158771,1.9122685927,0.<br/>           F,-4.3549159341,-0.1132219162,0.<br/>           F,-1.8157929956,-0.6653948338,0.<br/>           Cl,-0.2181054768,-0.2238572303,0.</p>   |
|  | <p>becl2_fcl_augp MP2= -1493.63195236 NIMAG= 0<br/>           Be,-3.1570054971,0.6732693946,0.<br/>           Cl,-2.3388403304,2.3144543538,0.<br/>           Cl,-4.653267555,-0.3831554272,0.<br/>           F,-1.7969712432,-0.6536726164,0.<br/>           Cl,-0.165103555,-0.3219883714,0.</p> |

|                                                                                    |                                                                                                                                                                                                                                                                                                                                                                                                                          |
|------------------------------------------------------------------------------------|--------------------------------------------------------------------------------------------------------------------------------------------------------------------------------------------------------------------------------------------------------------------------------------------------------------------------------------------------------------------------------------------------------------------------|
| 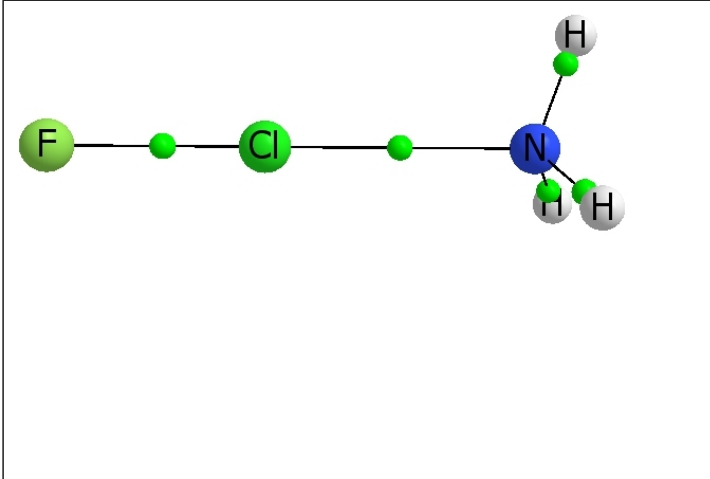   | <p>fcl_nh3_augp MP2= -615.83985723 NIMAG= 0<br/> N<br/> X,1,1.<br/> H,1,r1,2,a1<br/> H,1,r1,2,a1,3,120.,0<br/> H,1,r1,2,a1,3,-120.,0<br/> Cl,1,r2,3,a1,2,0.,0<br/> F,1,r3,3,a1,2,0.,0</p> <p>r1=1.01226254<br/> a1=110.14516891<br/> r2=2.23534533<br/> r3=3.94891787</p>                                                                                                                                                |
|   | <p>fcl_nhch2_augp MP2= -653.82703879 NIMAG= 0<br/> F,0.3052745941,0.,-0.9001821725<br/> Cl,0.1734484303,0.,0.8157583439<br/> N,-0.0621618853,0.,2.963727687<br/> H,0.7252783156,0.,3.6095365324<br/> C,-1.2092178271,0.,3.51550321<br/> H,-2.0832423859,0.,2.8738250626<br/> H,-1.3473022416,0.,4.5933303366</p>                                                                                                         |
|  | <p>fcl_nch_augp MP2= -652.63032400 NIMAG= 0<br/> F,-0.2290622413,0.,0.<br/> Cl,1.4269806959,0.,0.<br/> N,3.968497268,0.,0.<br/> C,5.1335470031,0.,0.<br/> H,6.2000372742,0.,0.</p>                                                                                                                                                                                                                                       |
|  | <p>beh2_fcl_nh3_augp MP2= -631.70308400<br/> NIMAG= 0<br/> N,0.0440356751,0.,0.1479970865<br/> H,1.0115155881,0.,-0.1632704846<br/> H,-0.4312643848,-0.8332282283,-0.1854097209<br/> H,-0.4312643848,0.8332282283,-0.1854097209<br/> Cl,0.0580151058,0.,2.0621749946<br/> F,0.105952045,0.,3.9795838915<br/> Be,1.5641163168,0.,4.6554067024<br/> H,2.5564066807,0.,3.6974930698<br/> H,1.4980626454,0.,6.0186940143</p> |

|  |                                                                                                                                                                                                                                                                                                                                                                                                                      |
|--|----------------------------------------------------------------------------------------------------------------------------------------------------------------------------------------------------------------------------------------------------------------------------------------------------------------------------------------------------------------------------------------------------------------------|
|  | <p>behf_fcl_nh3_E MP2= -730.96130536 NIMAG= 0<br/> N,0.0420355342,0.,0.1401680661<br/> H,1.0077226099,0.,-0.1771563173<br/> H,-0.4351448248,-0.833269592,-0.1911945871<br/> H,-0.4351448248,0.833269592,-0.1911945871<br/> Cl,0.0617991658,0.,2.0453358801<br/> F,0.0950224294,0.,3.9720370823<br/> Be,1.5569634212,0.,4.6442240964<br/> H,2.567736751,0.,3.7116142174<br/> F,1.5145850255,0.,6.0734259833</p>       |
|  | <p>behf_fcl_nh3_Z MP2= -730.96323995 NIMAG= 0<br/> N,0.0516217128,0.,0.1554504606<br/> H,1.0245381812,0.,-0.1396134718<br/> H,-0.4183468097,-0.8336362439,-0.1850464305<br/> H,-0.4183468097,0.8336362439,-0.1850464305<br/> Cl,0.0434161909,0.,2.0573778128<br/> F,0.0686602715,0.,3.9954740317<br/> Be,1.5267643525,0.,4.6604751966<br/> F,2.5587092238,0.,3.6458276137<br/> H,1.5385589728,0.,6.0223610495</p>    |
|  | <p>bef2_fcl_nh3_augp MP2= -830.21765989 NIMAG= 0<br/> N,0.0557599013,0.,0.1609185011<br/> H,1.0312892324,0.,-0.1275024084<br/> H,-0.4115260313,-0.8337733438,-0.1844278916<br/> H,-0.4115260313,0.8337733438,-0.1844278916<br/> Cl,0.0315616282,0.,2.0423223184<br/> F,0.053211555,0.,4.0004686943<br/> Be,1.5128421655,0.,4.634388097<br/> F,2.5507295019,0.,3.618361624<br/> F,1.5632333678,0.,6.0671587858</p>    |
|  | <p>becl2_fcl_nh3_augp MP2= -1550.15347917 NIMAG= 0<br/> N,0.0364724708,0.,0.1100791342<br/> H,1.0214547824,0.,-0.1527265697<br/> H,-0.421458306,-0.834969761,-0.2488562289<br/> H,-0.421458306,0.834969761,-0.2488562289<br/> Cl,-0.0248842127,0.,1.9406385898<br/> F,0.0278707746,0.,3.9828492666<br/> Be,1.4016211369,0.,4.6560930234<br/> Cl,2.8989904798,0.,3.447233339<br/> Cl,1.4569664566,0.,6.5408055126</p> |

|                                                                                     |                                                                                                                                                                                                                                                                                                                                                                                                                                            |
|-------------------------------------------------------------------------------------|--------------------------------------------------------------------------------------------------------------------------------------------------------------------------------------------------------------------------------------------------------------------------------------------------------------------------------------------------------------------------------------------------------------------------------------------|
| 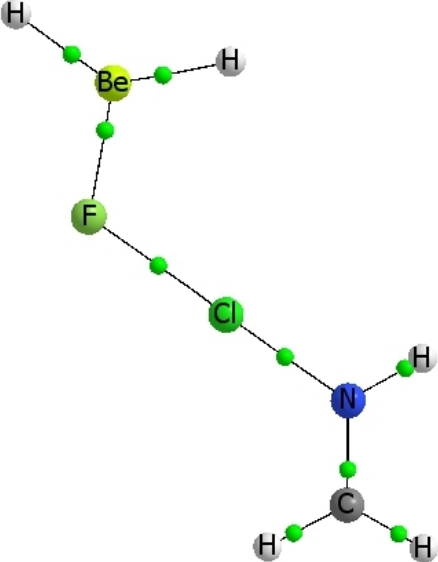   | <p>beh2_fcl_nhch2_augp MP2= -669.69539592<br/> NIMAG= 0<br/> F,0.347118782,0.,-1.0637328942<br/> Cl,0.1566051033,0.,0.9176552329<br/> N,0.0023583014,0.,2.6999131649<br/> H,0.8869977375,0.,3.2049133227<br/> C,-1.0983022427,0.,3.3404447014<br/> H,-2.0200302237,0.,2.7744359316<br/> H,-1.0932799972,0.,4.4224602192<br/> Be,1.8371108053,0.,-1.5899559291<br/> H,2.7429431363,0.,-0.537017805<br/> H,1.9582805979,0.,-2.9545859444</p> |
|   | <p>behf_fcl_nhch2_E MP2= -768.95399073<br/> NIMAG= 0<br/> F,0.3427480761,0.,-1.0556074225<br/> Cl,0.1643764347,0.,0.9403897151<br/> N,0.0002992471,0.,2.7145428144<br/> H,0.8811830036,0.,3.2259810776<br/> C,-1.1053416396,0.,3.3468308538<br/> H,-2.0230939178,0.,2.7744669361<br/> H,-1.1065660877,0.,4.42875921<br/> Be,1.8307449084,0.,-1.584487254<br/> H,2.7648309236,0.,-0.5629543613<br/> F,1.9706210517,0.,-3.013391569</p>      |
|  | <p>behf_fcl_nhch2_Z MP2= -768.95588784<br/> NIMAG= 0<br/> F,0.3124735342,0.,-1.0948707727<br/> Cl,0.1395621416,0.,0.9177576154<br/> N,0.0022809055,0.,2.6888361304<br/> H,0.8944109185,0.,3.1807387251<br/> C,-1.090525737,0.,3.3431864808<br/> H,-2.0196203851,0.,2.7896179431<br/> H,-1.0689371645,0.,4.4248415545<br/> Be,1.8039225818,0.,-1.600733156<br/> F,2.737946154,0.,-0.4822610704<br/> H,2.0082890511,0.,-2.9525834501</p>     |

|                                                                                    |                                                                                                                                                                                                                                                                                                                                                                                                                                             |
|------------------------------------------------------------------------------------|---------------------------------------------------------------------------------------------------------------------------------------------------------------------------------------------------------------------------------------------------------------------------------------------------------------------------------------------------------------------------------------------------------------------------------------------|
| 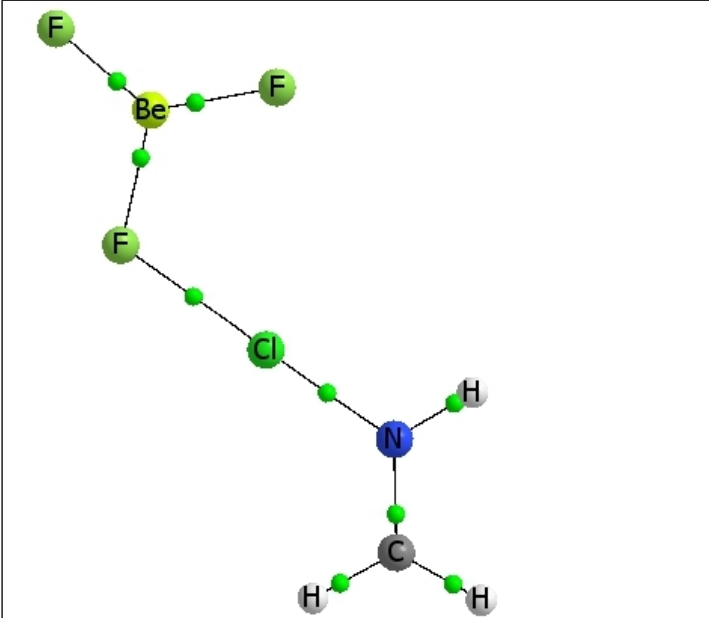   | <p>bef2_fcl_nhch2 MP2= -868.21102416 NIMAG= 0</p> <p>F,0.3017438496,0.,-1.1092199912<br/> Cl,0.1219417755,0.,0.9256166036<br/> N,-0.0021197029,0.,2.683307871<br/> H,0.8948916929,0.,3.1666899407<br/> C,-1.089783372,0.,3.3469749631<br/> H,-2.0238502453,0.,2.8020878937<br/> H,-1.0555042759,0.,4.4281042928<br/> Be,1.7953520076,0.,-1.5789333528<br/> F,2.7293227063,0.,-0.4547982888<br/> F,2.0478088492,0.,-2.9953008517</p>         |
|   | <p>becl2_fcl_nhch2_augp MP2= -1588.14865291 NIMAG= 0</p> <p>F,0.281876197,0.,-1.1266129652<br/> Cl,0.0294211964,0.,0.9937622402<br/> N,-0.0490913213,0.,2.7186909737<br/> H,0.8678523899,0.,3.1657888417<br/> C,-1.1144922168,0.,3.4193691885<br/> H,-2.068012235,0.,2.9099612322<br/> H,-1.0333048625,0.,4.497660169<br/> Be,1.7067984504,0.,-1.6281925617<br/> Cl,3.0625387492,0.,-0.2446127782<br/> Cl,2.0362169375,0.,-3.4912852597</p> |
|  | <p>beh2_fcl_nch_augp MP2= -668.47383432 NIMAG= 0</p> <p>Be,-3.0198661065,0.6481860627,0.<br/> H,-2.3287696186,1.8104140651,0.<br/> H,-4.2257380205,0.0416959542,0.<br/> F,-1.8857660838,-0.6692173285,0.<br/> Cl,-0.1772276773,-0.3671785347,0.<br/> N,1.9628398326,0.0069859645,0.<br/> C,3.0939648988,0.2702211119,0.<br/> H,4.1339724351,0.5117115749,0.</p>                                                                             |

|                                                                                     |                                                                                                                                                                                                                                                                                                                                                                       |
|-------------------------------------------------------------------------------------|-----------------------------------------------------------------------------------------------------------------------------------------------------------------------------------------------------------------------------------------------------------------------------------------------------------------------------------------------------------------------|
| 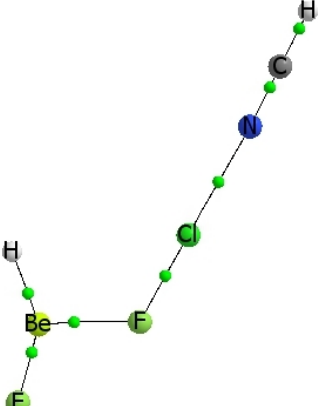   | <p>behf_fcl_nch_E MP2= -767.73147105 NIMAG= 0<br/> Be,-3.0044070757,0.6522275917,0.<br/> H,-2.3156447782,1.8115824443,0.<br/> F,-4.2817273801,0.0553154818,0.<br/> F,-1.8698948442,-0.697931699,0.<br/> Cl,-0.1670731176,-0.3770621595,0.<br/> N,1.9641557031,0.010215627,0.<br/> C,3.0943450931,0.2768827718,0.<br/> H,4.1336560593,0.5215888121,0.</p>              |
|    | <p>behf_fcl_nch_Z MP2= -767.73265806 NIMAG= 0<br/> Be,-3.0049307077,0.6186179648,0.<br/> F,-2.2729819397,1.8313892626,0.<br/> H,-4.2390240976,0.0790473593,0.<br/> F,-1.88116488,-0.7018080059,0.<br/> Cl,-0.1639637565,-0.3903408646,0.<br/> N,1.9444818419,-0.0104681932,0.<br/> C,3.0684720082,0.280080368,0.<br/> H,4.1025211912,0.5463009789,0.</p>              |
|   | <p>bef2_fcl_nch_mp2_augp MP2= -866.98499789 NIMAG= 0<br/> Be,-2.9437390724,0.5777827618,0.<br/> F,-2.2313849257,1.8130956642,0.<br/> F,-4.2657416036,0.0625316507,0.<br/> F,-1.8520155255,-0.719826109,0.<br/> Cl,-0.1140906941,-0.3796429497,0.<br/> N,1.895238388,0.0107699642,0.<br/> C,3.0161211676,0.3078008876,0.<br/> H,4.0490219258,0.580307,0.</p>           |
|  | <p>becl2_fcl_nch_mp2_augp MP2= -1586.91686046 NIMAG= 0<br/> Be,-2.8351799681,0.426525859,0.<br/> Cl,-2.0379867977,2.1590412294,0.<br/> Cl,-4.6469178516,-0.0691714423,0.<br/> F,-1.8037461072,-0.7349608089,0.<br/> Cl,0.1221309612,-0.3605396779,0.<br/> N,1.8293826771,-0.0138567476,0.<br/> C,2.9459808993,0.2855853189,0.<br/> H,3.9797458468,0.5601951392,0.</p> |



Table S3. Electron density properties of FCl and binary and ternary complexes at bond critical points

## F-Cl BCPs

| Moiety                                   | $\rho_{\text{bcp}}$ | $\nabla^2\rho_{\text{bcp}}$ | $H_{\text{bcp}}$ |
|------------------------------------------|---------------------|-----------------------------|------------------|
| FCl                                      | 0.2120              | -0.1845                     | -0.2152          |
| H <sub>2</sub> Be:FCl                    | 0.2014              | -0.1300                     | -0.1948          |
| HFBe:FCl (E)                             | 0.2052              | -0.1499                     | -0.2029          |
| HFBe:FCl (Z)                             | 0.2013              | -0.1299                     | -0.1950          |
| F <sub>2</sub> Be:FCl                    | 0.1995              | -0.1234                     | -0.1938          |
| Cl <sub>2</sub> Be:FCl                   | 0.1953              | -0.0998                     | -0.1843          |
| FCl:NCH                                  | 0.2036              | -0.1360                     | -0.1952          |
| H <sub>2</sub> Be:FCl:NCH                | 0.1667              | 0.0466                      | -0.1225          |
| HFBe:FCl:NCH (E)                         | 0.1670              | 0.0444                      | -0.1241          |
| HFBe:FCl:NCH (Z)                         | 0.1623              | 0.0655                      | -0.1151          |
| F <sub>2</sub> Be:FCl:NCH                | 0.1523              | 0.1058                      | -0.0987          |
| Cl <sub>2</sub> Be:FCl:NCH               | 0.0948              | 0.2398                      | -0.0283          |
| FCl:NH <sub>3</sub>                      | 0.1794              | 0.0093                      | -0.1381          |
| H <sub>2</sub> Be:FCl:NH <sub>3</sub>    | 0.1082              | 0.2245                      | -0.0394          |
| HFBe:FCl:NH <sub>3</sub> (E)             | 0.1053              | 0.2286                      | -0.0369          |
| HFBe:FCl:NH <sub>3</sub> (Z)             | 0.1025              | 0.2308                      | -0.0341          |
| F <sub>2</sub> Be:FCl:NH <sub>3</sub>    | 0.0972              | 0.2359                      | -0.0296          |
| Cl <sub>2</sub> Be:FCl:NH <sub>3</sub>   | 0.0778              | 0.2395                      | -0.0152          |
| FCl:NHCH <sub>2</sub>                    | 0.1767              | 0.0223                      | -0.1328          |
| H <sub>2</sub> Be:FCl:NHCH <sub>2</sub>  | 0.0903              | 0.2400                      | -0.0239          |
| HFBe:FCl:NHCH <sub>2</sub> (E)           | 0.0869              | 0.2413                      | -0.0214          |
| HFBe:FCl:NHCH <sub>2</sub> (Z)           | 0.0836              | 0.2401                      | -0.0190          |
| F <sub>2</sub> Be:FCl:NHCH <sub>2</sub>  | 0.0788              | 0.2395                      | -0.0157          |
| Cl <sub>2</sub> Be:FCl:NHCH <sub>2</sub> | 0.0619              | 0.2245                      | -0.0062          |

## Cl···N BCPs

| Moiety                                  | $\rho_{\text{bcp}}$ | $\nabla^2\rho_{\text{bcp}}$ | $H_{\text{bcp}}$ |
|-----------------------------------------|---------------------|-----------------------------|------------------|
| FCl:NCH                                 | 0.0275              | 0.1098                      | 0.0012           |
| H <sub>2</sub> Be:FCl:NCH               | 0.0657              | 0.1705                      | -0.0143          |
| HFBe:FCl:NCH (E)                        | 0.0666              | 0.1712                      | -0.0148          |
| HFBe:FCl:NCH (Z)                        | 0.0705              | 0.1730                      | -0.0171          |
| F <sub>2</sub> Be:FCl:NCH               | 0.0879              | 0.1752                      | -0.0288          |
| Cl <sub>2</sub> Be:FCl:NCH              | 0.1768              | 0.0064                      | -0.1352          |
| FCl:NH <sub>3</sub>                     | 0.0646              | 0.1397                      | -0.0139          |
| H <sub>2</sub> Be:FCl:NH <sub>3</sub>   | 0.1336              | 0.0696                      | -0.0670          |
| HFBe:FCl:NH <sub>3</sub> (E)            | 0.1363              | 0.0632                      | -0.0698          |
| HFBe:FCl:NH <sub>3</sub> (Z)            | 0.1373              | 0.0615                      | -0.0708          |
| F <sub>2</sub> Be:FCl:NH <sub>3</sub>   | 0.1436              | 0.0455                      | -0.0777          |
| Cl <sub>2</sub> Be:FCl:NH <sub>3</sub>  | 0.1607              | -0.0037                     | -0.0976          |
| FCl:NHCH <sub>2</sub>                   | 0.0750              | 0.1523                      | -0.0197          |
| H <sub>2</sub> Be:FCl:NHCH <sub>2</sub> | 0.1743              | -0.0200                     | -0.1172          |
| HFBe:FCl:NHCH <sub>2</sub> (E)          | 0.1773              | -0.0312                     | -0.1214          |
| HFBe:FCl:NHCH <sub>2</sub> (Z)          | 0.1793              | -0.0376                     | -0.1244          |

|                                          |        |         |         |
|------------------------------------------|--------|---------|---------|
| F <sub>2</sub> Be:FCl:NHCH <sub>2</sub>  | 0.1852 | -0.0612 | -0.1335 |
| Cl <sub>2</sub> Be:FCl:NHCH <sub>2</sub> | 0.2009 | -0.1280 | -0.1583 |

#### Be...F BCPs<sup>a</sup>

| Moiety                                   | $\rho_{\text{bcp}}$ | $\nabla^2\rho_{\text{bcp}}$ | $H_{\text{bcp}}$ |
|------------------------------------------|---------------------|-----------------------------|------------------|
| F <sub>2</sub> Be:FCl                    | 0.0214              | 0.0720                      | -0.0019          |
| Cl <sub>2</sub> Be:FCl                   | 0.0260              | 0.1917                      | 0.0048           |
| H <sub>2</sub> Be:FCl:NCH                | 0.0394              | 0.3857                      | 0.0131           |
| HFBe:FCl:NCH (E)                         | 0.0376              | 0.3383                      | 0.0104           |
| HFBe:FCl:NCH (Z)                         | 0.0411              | 0.3796                      | 0.0114           |
| H <sub>2</sub> Be:FCl:NCH                | 0.0475              | 0.4300                      | 0.0109           |
| Cl <sub>2</sub> Be:FCl:NCH               | 0.0783              | 0.7238                      | 0.0072           |
| H <sub>2</sub> Be:FCl:NH <sub>3</sub>    | 0.0633              | 0.6137                      | 0.0128           |
| HFBe:FCl:NH <sub>3</sub> (E)             | 0.0640              | 0.5994                      | 0.0111           |
| HFBe:FCl:NH <sub>3</sub> (Z)             | 0.0653              | 0.6151                      | 0.0111           |
| F <sub>2</sub> Be:FCl:NH <sub>3</sub>    | 0.0689              | 0.6333                      | 0.0091           |
| Cl <sub>2</sub> Be:FCl:NH <sub>3</sub>   | 0.0855              | 0.7866                      | 0.0045           |
| H <sub>2</sub> Be:FCl:NHCH <sub>2</sub>  | 0.0700              | 0.6732                      | 0.0112           |
| HFBe:FCl:NHCH <sub>2</sub> (E)           | 0.0712              | 0.6669                      | 0.0096           |
| HFBe:FCl:NHCH <sub>2</sub> (Z)           | 0.0723              | 0.6784                      | 0.0095           |
| F <sub>2</sub> Be:FCl:NHCH <sub>2</sub>  | 0.0755              | 0.6947                      | 0.0075           |
| Cl <sub>2</sub> Be:FCl:NHCH <sub>2</sub> | 0.0916              | 0.8422                      | 0.0020           |

#### Be...F BCPs (anions)

|                       | $\rho_{\text{bcp}}$ | $\nabla^2\rho_{\text{bcp}}$ | $H_{\text{bcp}}$ |
|-----------------------|---------------------|-----------------------------|------------------|
| BFH <sub>2</sub> (-)  | 0.1002              | 0.9297                      | -0.0015          |
| BF <sub>2</sub> H(-)  | 0.1005              | 0.9268                      | -0.0022          |
| BF <sub>3</sub> (-)   | 0.1009              | 0.9221                      | -0.0030          |
| BFCl <sub>2</sub> (-) | 0.1151              | 1.0549                      | -0.0103          |

a) No Be...F bond critical points are found for H<sub>2</sub>Be:FCl and HFBe:FCl (E and Z). See molecular graphs in Table S1.

Table S4. NBO bond orders for FCl, binary complexes XYBe:FCl and FCl:N-base, and ternary complexes XYBe:FCl:N-base

| Moiety                                   | Be...F | F-Cl   | Cl...N |
|------------------------------------------|--------|--------|--------|
| FCl                                      |        | 0.5174 |        |
| H <sub>2</sub> Be:FCl                    | 0.1496 | 0.4801 |        |
| HFBe:FCl(E)                              | 0.0714 | 0.4930 |        |
| HFBe:FCl (Z)                             | 0.1072 | 0.4821 |        |
| F <sub>2</sub> Be:FCl                    | 0.1586 | 0.4861 |        |
| Cl <sub>2</sub> Be:FCl                   | 0.2334 | 0.4554 |        |
| FCl:NCH                                  |        | 0.4664 | 0.0968 |
| H <sub>2</sub> Be:FCl:NCH                | 0.2830 | 0.3815 | 0.2611 |
| HFBe:FCl:NCH (E)                         | 0.2419 | 0.3953 | 0.2658 |
| HFBe:FCl:NCH (Z)                         | 0.2596 | 0.3725 | 0.2763 |
| F <sub>2</sub> Be:FCl:NCH                | 0.3059 | 0.3331 | 0.3513 |
| Cl <sub>2</sub> Be:FCl:NCH               | 0.4287 | 0.1853 | 0.6933 |
| FCl:NH <sub>3</sub>                      |        | 0.3766 | 0.2420 |
| H <sub>2</sub> Be:FCl:NH <sub>3</sub>    | 0.3251 | 0.2220 | 0.4794 |
| HFBe:FCl:NH <sub>3</sub> (E)             | 0.3256 | 0.2216 | 0.4902 |
| HFBe:FCl:NH <sub>3</sub> (Z)             | 0.3348 | 0.2054 | 0.4808 |
| F <sub>2</sub> Be:FCl:NH <sub>3</sub>    | 0.3769 | 0.1935 | 0.5312 |
| Cl <sub>2</sub> Be:FCl:NH <sub>3</sub>   | 0.4540 | 0.1576 | 0.5916 |
| FCl:NHCH <sub>2</sub>                    |        | 0.3698 | 0.2829 |
| H <sub>2</sub> Be:FCl:NHCH <sub>2</sub>  | 0.3458 | 0.1774 | 0.6576 |
| HFBe:FCl:NHCH <sub>2</sub> (E)           | 0.3477 | 0.1878 | 0.6688 |
| HFBe:FCl:NHCH <sub>2</sub> (Z)           | 0.3539 | 0.1701 | 0.6694 |
| F <sub>2</sub> Be:FCl:NHCH <sub>2</sub>  | 0.3976 | 0.1636 | 0.6896 |
| Cl <sub>2</sub> Be:FCl:NHCH <sub>2</sub> | 0.4766 | 0.1149 | 0.7473 |

Table S5. Many-body interaction energies (MBIE, kJ·mol<sup>-1</sup>) in binary and ternary complexes

| A:B                    | Er(A) | Er(B) | $\Delta^2E(A-B)$ | Ei (AB) |
|------------------------|-------|-------|------------------|---------|
| H <sub>2</sub> Be:FCl  | 5.5   | 0.4   | -15.4            | -9.5    |
| HFBe:FCl (E)           | 2.9   | 0.2   | -11.6            | -8.5    |
| HFBe:FCl (Z)           | 6.3   | 0.4   | -16.5            | -9.8    |
| F <sub>2</sub> Be:FCl  | 11.1  | 0.5   | -27.6            | -16.0   |
| Cl <sub>2</sub> Be:FCl | 17.7  | 1.0   | -33.6            | -14.9   |
|                        |       |       |                  |         |
| B:C                    | Er(B) | Er(C) | $\Delta^2E(B-C)$ | Ei (BC) |
| FCl:NH <sub>3</sub>    | 6.9   | 0.6   | -56.5            | -49.1   |
| FCl:NHCH <sub>2</sub>  | 8.2   | 2.1   | -61.5            | -51.2   |
| FCl:NCH                | 0.4   | 0.0   | -24.9            | -24.5   |

| A:B:C                                   | $\Delta E$ | E <sub>R</sub> (A) | E <sub>R</sub> (B) | E <sub>R</sub> (C) | Total E <sub>R</sub> | $\Delta^2E(AB)$ | $\Delta^2E(AC)$ | $\Delta^2E(BC)$ | Total $\Delta^2E$ | $\Delta^3E(ABC)$ |
|-----------------------------------------|------------|--------------------|--------------------|--------------------|----------------------|-----------------|-----------------|-----------------|-------------------|------------------|
| H <sub>2</sub> Be:FCl:NCH               | -53.5      | 22.5               | 11.0               | 0.2                | 33.7                 | -32.4           | -3.0            | -21.6           | -57               | -30.1            |
| HFBe:FCl:NCH (E)                        | -51.5      | 25.4               | 10.5               | 0.2                | 36.1                 | -30.5           | -3.7            | -20.9           | -55.1             | -32.5            |
| HFBe:FCl:NCH (Z)                        | -54.6      | 27.5               | 13.1               | 0.2                | 40.8                 | -37.6           | -3.4            | -20.7           | -61.7             | -33.7            |
| F <sub>2</sub> Be:FCl:NCH               | -67.5      | 38.1               | 19.3               | 0.3                | 57.7                 | -52.3           | -5.1            | -16.0           | -73.4             | -51.8            |
| Cl <sub>2</sub> Be:FCl:NCH              | -82.4      | 65.2               | 83.7               | 0.7                | 149.6                | -77.0           | -6.6            | -2.7            | -86.3             | -145.7           |
| H <sub>2</sub> Be:FCl:NH <sub>3</sub>   | -129.9     | 41.5               | 67.2               | 2.0                | 110.7                | -51.1           | -4.4            | -84.3           | -139.8            | -100.7           |
| HFBe:FCl:NH <sub>3</sub> (E)            | -129.4     | 48.0               | 70.5               | 1.9                | 120.4                | -43.7           | -5.2            | -85.0           | -133.8            | -116.0           |
| HFBe:FCl:NH <sub>3</sub> (Z)            | -134.5     | 50.7               | 74.7               | 2.0                | 127.4                | -61.6           | -5.6            | -87.0           | -154.1            | -107.8           |
| F <sub>2</sub> Be:FCl:NH <sub>3</sub>   | -152.8     | 62.1               | 82.3               | 2.0                | 146.4                | -68.1           | -7.1            | -88.0           | -163.2            | -136.0           |
| Cl <sub>2</sub> Be:FCl:NH <sub>3</sub>  | -178.2     | 75.1               | 114.8              | 2.2                | 192.1                | -84.8           | -7.4            | -99.2           | -191.4            | -178.8           |
| H <sub>2</sub> Be:FCl:NHCH <sub>2</sub> | -145.5     | 47.3               | 94.6               | 9.6                | 151.5                | -57.0           | -4.8            | -107.9          | -169.7            | -127.4           |
| HFBe:FCl:NHCH <sub>2</sub> (E)          | -146.0     | 54.3               | 99.8               | 9.7                | 163.8                | -45.3           | -5.6            | -109.9          | -160.9            | -148.9           |

|                                          |        |      |       |      |       |       |      |        |        |        |
|------------------------------------------|--------|------|-------|------|-------|-------|------|--------|--------|--------|
| HFBe:FCI:NHCH <sub>2</sub> (Z)           | -151.0 | 57.8 | 106.0 | 9.9  | 173.7 | -69.8 | -6.1 | -112.7 | -188.5 | -136.2 |
| F <sub>2</sub> Be:FCI:NHCH <sub>2</sub>  | -171.2 | 69.7 | 114.8 | 10.3 | 194.8 | -70.7 | -7.7 | -115.3 | -193.7 | -172.2 |
| Cl <sub>2</sub> Be:FCI:NHCH <sub>2</sub> | -201.3 | 82.0 | 149.8 | 11.4 | 243.2 | -90.8 | -8.2 | -126.5 | -225.5 | -219.0 |

Table S6. Coupling constants (J) and their components (Hz) across Be...F, F-Cl, and Cl...N bonds

| Moiety                                   | PSO | DSO  | FC    | SD   | <sup>1</sup> beJ(Be-F) |
|------------------------------------------|-----|------|-------|------|------------------------|
| H <sub>2</sub> Be:FCl                    | 1.1 | -0.2 | 22.2  | -0.2 | 22.9                   |
| H <sub>2</sub> Be:FCl:NH <sub>3</sub>    | 4.3 | -0.2 | 12.6  | -0.2 | 16.5                   |
| H <sub>2</sub> Be:FCl:NHCH <sub>2</sub>  | 4.7 | -0.2 | 4.6   | -0.1 | 8.9                    |
| H <sub>2</sub> Be:FCl:NCH                | 2.7 | -0.2 | 36.7  | -0.2 | 39.0                   |
| H <sub>2</sub> BeF <sup>-</sup>          | 6.8 | 0.0  | -28.3 | 0.2  | -21.4                  |
| HFBe:FCl ( <i>E</i> )                    | 0.6 | -0.3 | 12.5  | -0.2 | 12.6                   |
| HFBe:FCl:NH <sub>3</sub>                 | 3.4 | -0.4 | -1.8  | -0.3 | 1.0                    |
| HFBe:FCl:NHCH <sub>2</sub>               | 3.8 | -0.3 | -9.2  | -0.2 | -5.9                   |
| HFBe:FCl:NCH                             | 2.0 | -0.4 | 23.6  | -0.4 | 24.9                   |
| HBeF <sub>2</sub> <sup>-</sup>           | 5.6 | -0.2 | -37.4 | 0.0  | -32.0                  |
| HFBe:FCl ( <i>Z</i> )                    | 0.9 | -0.3 | 25.7  | -0.1 | 26.1                   |
| HFBe:FCl:NH <sub>3</sub>                 | 3.4 | -0.3 | 4.4   | -0.2 | 7.3                    |
| HFBe:FCl:NHCH <sub>2</sub>               | 3.8 | -0.3 | -4.8  | -0.2 | -1.5                   |
| HFBe:FCl:NCH                             | 2.1 | -0.4 | 33.4  | -0.2 | 34.9                   |
| HBeF <sub>2</sub> <sup>-</sup>           | 5.6 | -0.2 | -37.4 | 0.0  | -32.0                  |
| F <sub>2</sub> Be:FCl                    | 1.0 | -0.4 | 8.7   | -0.2 | 9.0                    |
| F <sub>2</sub> Be:FCl:NH <sub>3</sub>    | 2.9 | -0.5 | -29.8 | -0.3 | -27.7                  |
| F <sub>2</sub> Be:FCl:NHCH <sub>2</sub>  | 3.2 | -0.5 | -35.8 |      |                        |
| F <sub>2</sub> Be:FCl:NCH                | 2.0 | -0.5 | -9.9  | -0.3 | -8.8                   |
| F <sub>2</sub> BeF <sup>-</sup>          | 4.5 | -0.3 | -57.3 | 0.0  | -53.1                  |
| Cl <sub>2</sub> Be:FCl                   | 1.2 | -0.5 | 23.3  | -0.2 | 23.9                   |
| Cl <sub>2</sub> Be:FCl:NH <sub>3</sub>   | 4.5 | -0.4 | -30.6 |      |                        |
| Cl <sub>2</sub> Be:FCl:NHCH <sub>2</sub> |     |      | -36.4 |      |                        |
| Cl <sub>2</sub> Be:FCl:NCH               | 3.9 | -0.5 | -23.8 |      |                        |
| Cl <sub>2</sub> BeF <sup>-</sup>         | 6.4 | -0.3 | -55.6 | 0.0  | -49.5                  |

| Moiety                                   | PSO   | DSO | FC     | SD    | <sup>1</sup> J(F-Cl) |
|------------------------------------------|-------|-----|--------|-------|----------------------|
| F-Cl                                     | 642.0 | 0.1 | -99.4  | 255.3 | 798.0                |
| H <sub>2</sub> Be:FCl                    | 626.6 | 0.1 | -94.4  | 252.0 | 784.4                |
| HFBe:FCl (E)                             | 632.4 | 0.1 | -97.0  | 252.6 | 788.1                |
| HFBe:FCl (Z)                             | 629.6 | 0.1 | -96.3  | 252.4 | 785.8                |
| F <sub>2</sub> Be:FCl                    | 627.1 | 0.2 | -101.5 | 251.0 | 776.8                |
| Cl <sub>2</sub> Be:FCl                   | 615.5 | 0.2 | -96.5  | 248.7 | 767.9                |
| H <sub>2</sub> Be:FCl:NH <sub>3</sub>    | 199.7 | 0.1 | 294.2  | 68.7  | 562.8                |
| HFBe:FCl:NH <sub>3</sub> (E)             | 192.3 | 0.1 | 293.9  | 63.8  | 550.2                |
| HFBe:FCl:NH <sub>3</sub> (Z)             | 188.4 | 0.1 | 299.3  | 62.7  | 550.5                |
| F <sub>2</sub> Be:FCl:NH <sub>3</sub>    | 172.3 | 0.2 | 322.7  | 54.7  | 549.8                |
| Cl <sub>2</sub> Be:FCl:NH <sub>3</sub>   | 115.7 | 0.2 | 326.2  |       |                      |
| H <sub>2</sub> Be:FCl:NHCH <sub>2</sub>  | 122.7 | 0.1 | 336.8  | 37.8  | 497.4                |
| HFBe:FCl:NHCH <sub>2</sub> E             | 116.1 | 0.1 | 330.3  | 34.2  | 480.7                |
| HFBe:FCl:NHCH <sub>2</sub> Z             | 111.2 | 0.1 | 329.2  | 32.6  | 473.1                |
| F <sub>2</sub> Be:FCl:NHCH <sub>2</sub>  | 100.1 | 0.2 | 338.2  |       |                      |
| Cl <sub>2</sub> Be:FCl:NHCH <sub>2</sub> |       |     | 300.7  |       |                      |
| H <sub>2</sub> Be:FCl:NCH                | 432.3 | 0.1 | 54.3   | 175.7 | 662.5                |
| HFBe:FCl:NCH (E)                         | 431.7 | 0.2 | 49.3   | 173.3 | 654.5                |
| HFBe:FCl:NCH (Z)                         | 418.9 | 0.2 | 71.3   | 169.1 | 659.5                |
| F <sub>2</sub> Be:FCl:NCH                | 365.8 | 0.2 | 134.5  | 144.4 | 644.8                |
| Cl <sub>2</sub> Be:FCl:NCH               | 129.2 | 0.2 | 380.0  |       |                      |
| FCl:NH <sub>3</sub>                      | 467.4 | 0.1 | 36.9   | 189.2 | 693.6                |
| FCl:NHCH <sub>2</sub>                    | 440.7 | 0.1 | 60.0   | 178.8 | 679.6                |
| FCl:NCH                                  | 578.6 | 0.1 | -57.5  | 231.7 | 753.0                |

| Moiety                                   | PSO  | DSO | FC    | SD   | <sup>1</sup> XJ(Cl-N) |
|------------------------------------------|------|-----|-------|------|-----------------------|
| FCl:NH3                                  | -2.4 | 0.0 | -48.2 | -0.6 | -51.1                 |
| H <sub>2</sub> Be:FCl:NH <sub>3</sub>    | -5.9 | 0.0 | -17.3 | -2.7 | -25.9                 |
| HFBe:FCl:NH <sub>3</sub> E               | -6.0 | 0.0 | -16.1 | -2.8 | -24.9                 |
| HFBe:FCl:NH <sub>3</sub> Z               | -6.1 | 0.0 | -14.7 | -2.9 | -23.7                 |
| F <sub>2</sub> Be:FCl:NH <sub>3</sub>    | -6.3 | 0.0 | -10.5 | -3.0 | -19.9                 |
| Cl <sub>2</sub> Be:FCl:NH <sub>3</sub>   | -6.9 | 0.0 | 1.4   |      |                       |
| H <sub>3</sub> N-Cl <sup>+</sup>         | -8.8 | 0.0 | 21.7  | -4.4 | 8.5                   |
|                                          |      |     |       |      |                       |
| FCl:NHCH <sub>2</sub>                    | -1.3 | 0.0 | -54   | -0.1 | -55.4                 |
| H <sub>2</sub> Be:FCl:NHCH <sub>2</sub>  | -1.7 | 0.0 | 6.5   | -1.1 | 3.7                   |
| HFBe:FCl:NHCH <sub>2</sub> E             | -1.7 | 0.0 | 7.8   | -1.2 | 5.0                   |
| HFBe:FCl:NHCH <sub>2</sub> Z             | -1.6 | 0.0 | 9.6   | -1.1 | 6.8                   |
| F <sub>2</sub> Be:FCl:NHCH <sub>2</sub>  | -1.6 | 0.2 | 12.6  |      |                       |
| Cl <sub>2</sub> Be:FCl:NHCH <sub>2</sub> |      |     | 20.4  |      |                       |
| H <sub>2</sub> C=(H)N-Cl <sup>+</sup>    | -4.1 | 0.0 | 27.9  | -2.2 | 21.6                  |
|                                          |      |     |       |      |                       |
| FCl:NCH                                  | -0.4 | 0.0 | -32.3 | 0.1  | -32.7                 |
| H <sub>2</sub> Be:FCl:NCH                | -0.9 | 0.0 | -57.2 | 0.1  | -58.0                 |
| HFBe:FCl:NCH E                           | -0.9 | 0.0 | -58.3 | 0.1  | -59.1                 |
| HFBe:FCl:NCH Z                           | -0.9 | 0.0 | -57.9 | 0.1  | -58.7                 |
| F <sub>2</sub> Be:FCl:NCH                | -0.9 | 0.0 | -54.2 | 0.1  | -54.9                 |
| Cl <sub>2</sub> Be:FCl:NCH               | 0.7  | 0.0 | 18.0  |      |                       |
| HCN-Cl <sup>+</sup>                      | 0    | 0.0 | 48.6  | 0.3  | 48.8                  |
